# Supplementary material for: Soil-type influences human selenium status and underlies widespread selenium deficiency risks in Malawi
Source: PubMed Central journal article supplement — Sci Rep. 2013 Mar 12;3:1425. doi: 10.1038/srep01425 (PMC3594796; doi:10.1038/srep01425), 2013-03-12
Supplement: srep01425-s1.pdf [file srep01425-s1.pdf]

**Soil-type influences human selenium status and underlies widespread selenium  
deficiency risks in Malawi**

<sup>†1</sup>Rachel Hurst, <sup>†2</sup>Edwin WP Siyame, <sup>†3</sup>Scott D Young, <sup>3,4</sup>Allan DC Chilimba, <sup>3,5</sup>Edward JM Joy, <sup>3</sup>Colin R Black, <sup>5</sup>E Louise Ander, <sup>5</sup>Michael J Watts, <sup>6</sup>Benson Chilima, <sup>6</sup>Jellita Gondwe, <sup>7</sup>Dalitso Kang'ombe, <sup>8</sup>Alexander J Stein, <sup>1</sup>Susan J Fairweather-Tait, <sup>9</sup>Rosalind S Gibson, <sup>2‡</sup>Alexander A Kalimbira, <sup>\*‡3</sup>Martin R Broadley

<sup>†,‡</sup>Contributed equally

\*Correspondence to [martin.broadley@nottingham.ac.uk](mailto:martin.broadley@nottingham.ac.uk)

<sup>1</sup>Department of Nutrition, Norwich Medical School, University of East Anglia, Norwich,  
NR4 7TJ, UK

<sup>2</sup>Department of Home Economics and Human Nutrition, Bunda College of Agriculture,  
University of Malawi, P.O. Box 219, Lilongwe, Malawi

<sup>3</sup>School of Biosciences, University of Nottingham, Sutton Bonington Campus,  
Loughborough, LE12 5RD, UK

<sup>4</sup>Ministry of Agriculture and Food Security, Department of Agricultural Research Services,  
Lunyangwa Research Station, P.O. Box 59, Mzuzu, Malawi

<sup>5</sup>British Geological Survey, Keyworth, Nottingham, NG12 5GG, UK

<sup>6</sup>Community Health Sciences Unit, Ministry of Health, Private Bag 65, Lilongwe, Malawi

<sup>7</sup>Nutrition Unit of Ministry of Health, P.O. Box 30377, Lilongwe 3

<sup>8</sup>IFPRI, 2033 K Street NW, Washington, DC 20006, USA

<sup>9</sup>University of Otago, P.O. Box 56, Dunedin, New Zealand

**Supplementary Table 1.** Background data on participants, including socio-economic status (SES), collected using questionnaires administered by trained interviewers in the homes.

| Variable                   | Mikalango |       |      | Zombwe |       |      |
|----------------------------|-----------|-------|------|--------|-------|------|
|                            | n         | Mean  | SD   | n      | Mean  | SD   |
| Age (years)                | 60        | 34.8  | 9.6  | 60     | 39.1  | 11   |
| Height (cm)                | 55        | 152.8 | 5.9  | 53     | 156.5 | 5.5  |
| Weight (kg)                | 56        | 52.8  | 8    | 53     | 55.4  | 11.6 |
| BMI (wt ht <sup>-2</sup> ) | 55        | 22.5  | 3.3  | 53     | 22.5  | 4.1  |
| SES Index <sup>1,2</sup>   | 60        | 5     | 4, 6 | 60     | 7     | 5, 8 |

<sup>1</sup>Median, 1<sup>st</sup> and 3<sup>rd</sup> quartile

<sup>2</sup>Variables included were house quality; sanitation; water source; household size; occupation; schooling.

Supplementary Table 2. Raw biomarker and dietary Se concentration data, including village identifier and volunteer code (n.d. = no data)

| EPA       | Village       | Volunteer code | Composite diet Se concentration (mg d <sup>-1</sup> ) | Blood plasma Se concentration (µg L <sup>-1</sup> ) | Gpx3 activity (nmol min <sup>-1</sup> mL <sup>-1</sup> U/mL) | Urine Se concentration (µg L <sup>-1</sup> , creatinine corrected) |
|-----------|---------------|----------------|-------------------------------------------------------|-----------------------------------------------------|--------------------------------------------------------------|--------------------------------------------------------------------|
| ZOMBWE    | Bandawe Tembo | W-Ban-2086     | 0.0011                                                | 35.8                                                | 145.1                                                        | 4.5                                                                |
| ZOMBWE    | Bandawe Tembo | W-Ban-2087     | 0.0036                                                | 32.3                                                | 127.5                                                        | 6.8                                                                |
| ZOMBWE    | Bandawe Tembo | W-Ban-2088     | 0.0040                                                | 50.5                                                | 173.3                                                        | 6.5                                                                |
| ZOMBWE    | Bandawe Tembo | W-Ban-2089     | 0.0069                                                | 66.4                                                | 176.8                                                        | 10.5                                                               |
| ZOMBWE    | Bandawe Tembo | W-Ban-2090     | 0.0046                                                | 53.7                                                | 146.9                                                        | 5.6                                                                |
| ZOMBWE    | Bandawe Tembo | W-Ban-2091     | 0.0059                                                | 42.5                                                | 166.2                                                        | 7.2                                                                |
| ZOMBWE    | Bandawe Tembo | W-Ban-2092     | n.d.                                                  | 54.6                                                | 162.7                                                        | 6.7                                                                |
| ZOMBWE    | Bandawe Tembo | W-Ban-2093     | n.d.                                                  | 57.4                                                | 168.0                                                        | 6.4                                                                |
| ZOMBWE    | Bandawe Tembo | W-Ban-2094     | 0.0057                                                | 45.9                                                | 176.8                                                        | 5.8                                                                |
| ZOMBWE    | Bandawe Tembo | W-Ban-2095     | 0.0623                                                | 61.1                                                | 203.2                                                        | 7.1                                                                |
| ZOMBWE    | Bandawe Tembo | W-Ban-2096     | 0.0076                                                | 52.8                                                | 176.8                                                        | 8.9                                                                |
| ZOMBWE    | Kenani        | W-Ken-2070     | 0.0057                                                | 56.5                                                | 144.2                                                        | 7.6                                                                |
| ZOMBWE    | Kenani        | W-Ken-2071     | 0.0088                                                | 58.2                                                | 144.2                                                        | 7.1                                                                |
| ZOMBWE    | Kenani        | W-Ken-2066     | 0.0017                                                | 41.9                                                | 123.1                                                        | 6.5                                                                |
| ZOMBWE    | Kenani        | W-Ken-2067     | 0.0045                                                | 53.2                                                | 139.0                                                        | 9.7                                                                |
| ZOMBWE    | Kenani        | W-Ken-2068     | 0.0039                                                | 45.6                                                | 126.7                                                        | 6.1                                                                |
| ZOMBWE    | Kenani        | W-Ken-2069     | n.d.                                                  | 48.6                                                | 139.0                                                        | 8.3                                                                |
| ZOMBWE    | Msekeni       | W-Mse-2097     | 0.0062                                                | 46.5                                                | 148.6                                                        | 5.4                                                                |
| ZOMBWE    | Msekeni       | W-Mse-2098     | 0.0058                                                | 57.2                                                | 168.0                                                        | 8.7                                                                |
| ZOMBWE    | Msekeni       | W-Mse-2099     | 0.0095                                                | 73.6                                                | 190.9                                                        | 9.8                                                                |
| ZOMBWE    | Msekeni       | W-Mse-2100     | 0.0358                                                | 68.4                                                | 187.3                                                        | 7.8                                                                |
| ZOMBWE    | Msekeni       | W-Mse-2101     | 0.0047                                                | 52.5                                                | 173.3                                                        | 7.0                                                                |
| ZOMBWE    | Msekeni       | W-Mse-2102     | 0.0101                                                | 69.2                                                | 199.7                                                        | 11.3                                                               |
| ZOMBWE    | Msekeni       | W-Mse-2103     | 0.0140                                                | 46.5                                                | 161.0                                                        | 4.9                                                                |
| ZOMBWE    | Msekeni       | W-Mse-2104     | 0.0097                                                | 62.5                                                | 203.2                                                        | 12.1                                                               |
| ZOMBWE    | Msekeni       | W-Mse-2105     | 0.0030                                                | 47.9                                                | 173.3                                                        | 7.1                                                                |
| ZOMBWE    | Msekeni       | W-Mse-2106     | 0.0213                                                | 63.8                                                | 197.9                                                        | 7.8                                                                |
| ZOMBWE    | Msekeni       | W-Mse-2107     | 0.0132                                                | 46.5                                                | 169.7                                                        | 13.3                                                               |
| ZOMBWE    | Msekeni       | W-Mse-2108     | 0.0059                                                | 55.1                                                | 197.9                                                        | 7.8                                                                |
| ZOMBWE    | Msekeni       | W-Mse-2109     | 0.0147                                                | 36.2                                                | 153.9                                                        | n.d.                                                               |
| ZOMBWE    | Msekeni       | W-Mse-2110     | 0.0039                                                | 44.5                                                | 194.4                                                        | 5.2                                                                |
| ZOMBWE    | Msekeni       | W-Mse-2111     | 0.0098                                                | 48.9                                                | 166.2                                                        | 9.2                                                                |
| ZOMBWE    | Msekeni       | W-Mse-2112     | 0.0079                                                | 54.2                                                | 194.4                                                        | 7.2                                                                |
| ZOMBWE    | Msekeni       | W-Mse-2113     | 0.0198                                                | 43.1                                                | 164.5                                                        | 5.4                                                                |
| ZOMBWE    | Ngayiwona     | W-Nga-2114     | 0.0130                                                | 64.0                                                | 197.9                                                        | 7.2                                                                |
| ZOMBWE    | Ngayiwona     | W-Nga-2115     | 0.0096                                                | 44.8                                                | 180.3                                                        | 7.8                                                                |
| ZOMBWE    | Ngayiwona     | W-Nga-2116     | 0.0182                                                | 57.3                                                | 156.6                                                        | 7.3                                                                |
| ZOMBWE    | Ngayiwona     | W-Nga-2117     | 0.0043                                                | 58.7                                                | 177.7                                                        | 8.4                                                                |
| ZOMBWE    | Ngayiwona     | W-Nga-2118     | 0.0024                                                | 67.2                                                | 206.7                                                        | 7.7                                                                |
| ZOMBWE    | Ngayiwona     | W-Nga-2119     | 0.0148                                                | 56.6                                                | 151.3                                                        | 7.1                                                                |
| ZOMBWE    | Ngayiwona     | W-Nga-2120     | 0.0078                                                | 53.7                                                | 181.2                                                        | 6.4                                                                |
| ZOMBWE    | Yesaya_Jere   | W-Yes-2072     | 0.0029                                                | 66.5                                                | 133.7                                                        | 7.0                                                                |
| ZOMBWE    | Yesaya_Jere   | W-Yes-2073     | 0.0036                                                | 57.9                                                | 142.5                                                        | 7.7                                                                |
| ZOMBWE    | Yesaya_Jere   | W-Yes-2074     | 0.0118                                                | 50.4                                                | 130.2                                                        | 6.7                                                                |
| ZOMBWE    | Yesaya_Jere   | W-Yes-2075     | 0.0086                                                | 58.5                                                | 123.1                                                        | 12.3                                                               |
| ZOMBWE    | Yesaya_Jere   | W-Yes-2076     | 0.0071                                                | 51.3                                                | 151.3                                                        | 8.1                                                                |
| ZOMBWE    | Yesaya_Jere   | W-Yes-2077     | 0.0055                                                | 56.3                                                | 168.9                                                        | 5.3                                                                |
| ZOMBWE    | Yesaya_Jere   | W-Yes-2078     | 0.0058                                                | 41.1                                                | 116.1                                                        | 4.1                                                                |
| ZOMBWE    | Yesaya_Jere   | W-Yes-2079     | n.d.                                                  | 39.1                                                | 130.2                                                        | 4.7                                                                |
| ZOMBWE    | Yesaya_Jere   | W-Yes-2080     | 0.0078                                                | 71.1                                                | 163.6                                                        | 9.9                                                                |
| ZOMBWE    | Yesaya_Jere   | W-Yes-2081     | 0.0069                                                | 51.1                                                | 144.2                                                        | 9.7                                                                |
| ZOMBWE    | Yesaya_Jere   | W-Yes-2082     | 0.0167                                                | 58.2                                                | 130.2                                                        | 9.7                                                                |
| ZOMBWE    | Yesaya_Jere   | W-Yes-2083     | 0.0031                                                | 56.0                                                | 140.7                                                        | 8.2                                                                |
| ZOMBWE    | Yesaya_Jere   | W-Yes-2084     | 0.0034                                                | 44.3                                                | 133.7                                                        | 5.3                                                                |
| ZOMBWE    | Yesaya_Jere   | W-Yes-2085     | 0.0050                                                | 78.4                                                | 138.1                                                        | 10.2                                                               |
| ZOMBWE    | Yolamu        | W-Yoi-2061     | 0.0085                                                | 55.3                                                | 163.6                                                        | 10.4                                                               |
| ZOMBWE    | Yolamu        | W-Yoi-2062     | 0.0067                                                | 53.1                                                | 158.3                                                        | 9.5                                                                |
| ZOMBWE    | Yolamu        | W-Yoi-2063     | 0.0188                                                | 52.2                                                | 156.6                                                        | 9.6                                                                |
| ZOMBWE    | Yolamu        | W-Yoi-2064     | 0.0036                                                | 43.5                                                | 149.5                                                        | 8.6                                                                |
| ZOMBWE    | Yolamu        | W-Yoi-2065     | 0.0092                                                | 40.6                                                | 127.5                                                        | 7.1                                                                |
| MIKALANGO | Billy         | W-Bil-1001     | 0.0946                                                | 117.9                                               | 182.1                                                        | 24.3                                                               |
| MIKALANGO | Billy         | W-Bil-1002     | 0.1385                                                | 139.9                                               | 185.6                                                        | 45.6                                                               |
| MIKALANGO | Billy         | W-Bil-1003     | 0.1114                                                | 144.8                                               | 163.6                                                        | 55.1                                                               |
| MIKALANGO | Billy         | W-Bil-1004     | 0.0144                                                | 114.2                                               | 169.7                                                        | n.d.                                                               |
| MIKALANGO | Billy         | W-Bil-1005     | 0.1057                                                | 180.8                                               | 169.7                                                        | 40.4                                                               |
| MIKALANGO | Billy         | W-Bil-1006     | n.d.                                                  | 107.9                                               | 162.7                                                        | 49.4                                                               |
| MIKALANGO | Billy         | W-Bil-1007     | 0.0284                                                | 129.8                                               | 161.0                                                        | 32.2                                                               |
| MIKALANGO | Billy         | W-Bil-1008     | 0.0648                                                | 148.8                                               | 182.1                                                        | 29.0                                                               |
| MIKALANGO | Billy         | W-Bil-1009     | 0.0547                                                | 144.3                                               | 162.7                                                        | 58.9                                                               |
| MIKALANGO | Billy         | W-Bil-1010     | 0.0981                                                | 203.8                                               | 173.3                                                        | 33.9                                                               |
| MIKALANGO | Billy         | W-Bil-1011     | 0.0533                                                | 119.1                                               | 164.5                                                        | 51.0                                                               |
| MIKALANGO | Billy         | W-Bil-1012     | 0.0490                                                | 117.2                                               | 169.7                                                        | n.d.                                                               |
| MIKALANGO | Billy         | W-Bil-1013     | 0.0383                                                | 129.4                                               | 188.1                                                        | 24.1                                                               |
| MIKALANGO | Billy         | W-Bil-1014     | 0.0850                                                | 134.3                                               | n.d.                                                         | 49.7                                                               |
| MIKALANGO | Billy         | W-Bil-1015     | 0.0153                                                | 116.4                                               | 197.1                                                        | 25.1                                                               |
| MIKALANGO | Billy         | W-Bil-1016     | 0.1918                                                | 115.4                                               | n.d.                                                         | 65.9                                                               |
| MIKALANGO | Chamwaka      | W-Cha-1019     | 0.0558                                                | 116.5                                               | n.d.                                                         | 19.6                                                               |
| MIKALANGO | Chamwaka      | W-Cha-1020     | 0.1075                                                | 148.9                                               | 143.4                                                        | 30.3                                                               |
| MIKALANGO | Chamwaka      | W-Cha-1021     | 0.1348                                                | 119.4                                               | 150.4                                                        | 21.0                                                               |
| MIKALANGO | Chamwaka      | W-Cha-1022     | 0.0277                                                | 102.3                                               | 141.6                                                        | 18.1                                                               |
| MIKALANGO | Chamwaka      | W-Cha-1023     | n.d.                                                  | 115.8                                               | 136.3                                                        | 45.1                                                               |
| MIKALANGO | Chamwaka      | W-Cha-1024     | 0.0286                                                | 126.0                                               | 113.5                                                        | 15.9                                                               |
| MIKALANGO | Chifundo      | W-Chif-1040    | 0.0519                                                | 104.1                                               | n.d.                                                         | 16.9                                                               |
| MIKALANGO | Chifundo      | W-Chif-1041    | 0.0608                                                | 120.5                                               | 159.2                                                        | 19.0                                                               |
| MIKALANGO | Chifundo      | W-Chif-1042    | 0.0389                                                | 97.6                                                | 178.5                                                        | 21.0                                                               |
| MIKALANGO | Chifundo      | W-Chif-1043    | 0.0326                                                | 103.3                                               | 164.5                                                        | 18.1                                                               |
| MIKALANGO | Chifundo      | W-Chif-1044    | 0.1557                                                | 128.6                                               | n.d.                                                         | 37.4                                                               |
| MIKALANGO | Chifundo      | W-Chif-1045    | 0.0731                                                | 121.1                                               | 180.3                                                        | 16.1                                                               |
| MIKALANGO | Chifundo      | W-Chif-1046    | 0.0667                                                | 84.5                                                | 146.9                                                        | 13.4                                                               |
| MIKALANGO | Chifundo      | W-Chif-1047    | 0.0898                                                | 117.1                                               | 155.7                                                        | 36.4                                                               |
| MIKALANGO | Chifundo      | W-Chif-1048    | 0.0798                                                | 113.4                                               | 113.5                                                        | n.d.                                                               |
| MIKALANGO | Chifundo      | W-Chif-1037    | 0.0325                                                | 87.2                                                | 187.3                                                        | 14.1                                                               |
| MIKALANGO | Chifundo      | W-Chif-1038    | 0.0331                                                | 130.6                                               | n.d.                                                         | 25.8                                                               |
| MIKALANGO | Chifundo      | W-Chif-1039    | 0.0194                                                | 111.6                                               | 216.7                                                        | 21.4                                                               |
| MIKALANGO | Chimkango     | W-Chi-1025     | 0.0138                                                | 107.9                                               | 159.2                                                        | 20.4                                                               |
| MIKALANGO | Chimkango     | W-Chi-1026     | 0.0300                                                | 130.7                                               | 153.9                                                        | 55.4                                                               |
| MIKALANGO | Chimkango     | W-Chi-1027     | 0.0314                                                | 91.8                                                | 148.6                                                        | 26.6                                                               |
| MIKALANGO | Chimkango     | W-Chi-1028     | 0.0978                                                | 110.1                                               | 171.5                                                        | 19.5                                                               |
| MIKALANGO | Chimkango     | W-Chi-1029     | 0.0617                                                | 105.6                                               | 171.5                                                        | 19.7                                                               |
| MIKALANGO | Chimkango     | W-Chi-1030     | 0.0537                                                | 119.7                                               | 166.2                                                        | 22.1                                                               |
| MIKALANGO | Chimkango     | W-Chi-1031     | 0.0416                                                | 175.8                                               | 187.3                                                        | 68.2                                                               |
| MIKALANGO | Chimkango     | W-Chi-1032     | 0.1224                                                | 127.8                                               | n.d.                                                         | 75.5                                                               |
| MIKALANGO | Moses         | W-Mos-1049     | 0.0455                                                | 142.6                                               | 124.0                                                        | 31.9                                                               |
| MIKALANGO | Moses         | W-Mos-1050     | 0.0652                                                | 119.3                                               | 192.6                                                        | 30.6                                                               |
| MIKALANGO | Moses         | W-Mos-1051     | 0.1464                                                | 109.6                                               | 190.9                                                        | n.d.                                                               |
| MIKALANGO | Moses         | W-Mos-1052     | 0.0193                                                | 84.1                                                | 196.1                                                        | 12.4                                                               |
| MIKALANGO | Moses         | W-Mos-1053     | 0.0670                                                | 92.9                                                | 203.2                                                        | 14.6                                                               |
| MIKALANGO | Moses         | W-Mos-1054     | 0.1675                                                | 133.9                                               | 176.8                                                        | 105.8                                                              |
| MIKALANGO | Moses         | W-Mos-1055     | 0.0460                                                | 103.5                                               | 183.8                                                        | 25.1                                                               |
| MIKALANGO | Moses         | W-Mos-1056     | 0.0515                                                | 98.0                                                | 212.0                                                        | 27.6                                                               |
| MIKALANGO | Moses         | W-Mos-1057     | 0.0768                                                | 102.6                                               | 215.5                                                        | 19.6                                                               |
| MIKALANGO | Moses         | W-Mos-1058     | 0.0271                                                | 82.6                                                | 199.7                                                        | 12.5                                                               |
| MIKALANGO | Moses         | W-Mos-1059     | 0.0058                                                | 98.9                                                | 229.6                                                        | 14.0                                                               |
| MIKALANGO | Moses         | W-Mos-1060     | 0.0764                                                | 124.1                                               | 204.9                                                        | 15.6                                                               |
| MIKALANGO | Mozyenti      | W-Moz-1013     | 0.0075                                                | 102.1                                               | 187.3                                                        | 17.9                                                               |
| MIKALANGO | Mozyenti      | W-Moz-1014     | 0.0144                                                | 114.1                                               | 176.8                                                        | 21.5                                                               |
| MIKALANGO | Mozyenti      | W-Moz-1015     | 0.1664                                                | 140.0                                               | 212.0                                                        | 63.6                                                               |
| MIKALANGO | Mozyenti      | W-Moz-1016     | 0.0723                                                | 105.3                                               | 201.4                                                        | 25.6                                                               |
| MIKALANGO | Mozyenti      | W-Moz-1017     | 0.0110                                                | 111.9                                               | 195.3                                                        | 30.4                                                               |
| MIKALANGO | Mozyenti      | W-Moz-1018     | 0.0403                                                | 118.5                                               | 205.8                                                        | 39.3                                                               |

**Supplementary Table 3.** Food Se composition data from literature sources, used in conjunction with food balance sheets to estimate dietary Se availability

| Region | Item (FAO Food Balance Sheet category) | Fitted Item (item is as described in published source)                         | Source | Se concentration ( $\mu\text{g Se } 100 \text{ g}^{-2}$ fresh weight) | Source key                                    |
|--------|----------------------------------------|--------------------------------------------------------------------------------|--------|-----------------------------------------------------------------------|-----------------------------------------------|
| E      | Apples                                 | Apples, raw, with skin                                                         | e      | 0                                                                     |                                               |
| E      | Aquatic Animals, Others                | Matemba (fresh)                                                                | c      | 11.1                                                                  | c (ref. 37)                                   |
| E      | Aquatic Plants                         | Seaweed, agar, raw                                                             | e      | 0.7                                                                   | e (ref. 22)                                   |
| E      | Bananas                                | Banana                                                                         | c      | 0.5                                                                   | f (ref. 21)                                   |
| E      | Barley                                 | Barley, pearled, raw                                                           | e      | 37.7                                                                  | g (ref. 38)                                   |
| E      | Beans                                  | Bengal beans                                                                   | c      | 2.5                                                                   |                                               |
| E      | Beer                                   | Beer Europe (4.4% alcohol)                                                     | f      | 0                                                                     | N.B. sources a,b and d not used in this table |
| E      | Beverages, Alcoholic                   | Alcoholic beverage, distilled, all (gin, rum, vodka, whiskey) 80° proof        | e      | 0                                                                     |                                               |
| E      | Beverages, Fermented                   | Sorghum porridge                                                               | c      | 9.3                                                                   |                                               |
| E      | Bovine Meat                            | Beef, meat, approx. 20% fat, raw                                               | f      | 8                                                                     |                                               |
| E      | Butter, Ghee                           | Ghee, butter                                                                   | g      | 0                                                                     |                                               |
| E      | Cassava                                | Cassava, raw                                                                   | f      | 1                                                                     |                                               |
| E      | Cephalopods                            | Molluscs, squid, mixed species, raw                                            | e      | 44.8                                                                  |                                               |
| E      | Cereals, Other                         | Wheat flour, white                                                             | f      | 2                                                                     |                                               |
| E      | Citrus, Other                          | Orange, raw                                                                    | f      | 1                                                                     |                                               |
| E      | Cloves                                 | Spices, cloves, ground                                                         | e      | 5.9                                                                   |                                               |
| E      | Cocoa Beans                            | Cocoa, dry powder, unsweetened                                                 | e      | 14.3                                                                  |                                               |
| E      | Coconut Oil                            | Coconut oil                                                                    | f      | 0                                                                     |                                               |
| E      | Coconuts - Incl Copra                  | Coconut, raw                                                                   | f      | 810                                                                   |                                               |
| E      | Coffee                                 | Coffee, brewed from grounds, prepared with tap water                           | e      | 0                                                                     |                                               |
| E      | Cottonseed Oil                         | Cottonseed oil                                                                 | g      | 0                                                                     |                                               |
| E      | Cream                                  | Cream, fresh, double, including Jersey cream                                   | g      | 3                                                                     |                                               |
| E      | Crustaceans                            | Crustaceans, crab, blue, raw                                                   | e      | 37.4                                                                  |                                               |
| E      | Dates                                  | Dates, deglet noor                                                             | e      | 3                                                                     |                                               |
| E      | Demersal Fish                          | Fish, herring, Pacific, raw                                                    | e      | 36.5                                                                  |                                               |
| E      | Eggs                                   | Egg, raw                                                                       | f      | 11                                                                    |                                               |
| E      | Fats, Animals, Raw                     | Lard                                                                           | e      | 0.2                                                                   |                                               |
| E      | Fish, Body Oil                         | Fish oil, sardine                                                              | e      | 0                                                                     |                                               |
| E      | Fish, Liver Oil                        | Fish oil, cod liver                                                            | e      | 0                                                                     |                                               |
| E      | Freshwater Fish                        | Matemba (fresh)                                                                | c      | 11.1                                                                  |                                               |
| E      | Fruits, Other                          | Mango (raw)                                                                    | f      | 0.6                                                                   |                                               |
| E      | Grapefruit                             | Grapefruit, raw, pink and red and white, all areas                             | e      | 0.1                                                                   |                                               |
| E      | Grapes                                 | Grapes, red or green (European type varieties, such as Thompson seedless), raw | e      | 0.1                                                                   |                                               |
| E      | Groundnut Oil                          | Groundnut oil                                                                  | f      | 0                                                                     |                                               |
| E      | Groundnuts (Shelled Eq)                | Groundnut, dried, raw                                                          | f      | 3                                                                     |                                               |
| E      | Honey                                  | Honey                                                                          | f      | 1                                                                     |                                               |
| E      | Lemons, Limes                          | Lemon, fruit, raw                                                              | f      | 0                                                                     |                                               |
| E      | Maize                                  | White Ufa                                                                      | c      | 2.6                                                                   |                                               |
| E      | Maize Germ Oil                         | Wheatgerm oil                                                                  | g      | 0                                                                     |                                               |
| E      | Marine Fish, Other                     | Fish, herring, Pacific, raw                                                    | e      | 36.5                                                                  |                                               |
| E      | Meat, Aquatic Mammals                  | Fish, herring, Pacific, raw                                                    | e      | 36.5                                                                  |                                               |
| E      | Meat, Other                            | Lamb, meat not specified, raw                                                  | f      | 4                                                                     |                                               |
| E      | Milk - Excluding Butter                | Milk, cow, whole, raw                                                          | f      | 1                                                                     |                                               |
| E      | Millet                                 | Millet flour                                                                   | c      | 8                                                                     |                                               |
| E      | Molluscs, Other                        | Molluscs, snail, raw                                                           | e      | 27.4                                                                  |                                               |
| E      | Mutton & Goat Meat                     | Lamb, meat not specified, raw                                                  | f      | 4                                                                     |                                               |
| E      | Nuts                                   | Cashew nut, raw                                                                | f      | 24                                                                    |                                               |
| E      | Oats                                   | Wheat flour, white                                                             | f      | 2                                                                     |                                               |
| E      | Offals, Edible                         | Beef liver, raw                                                                | f      | 40                                                                    |                                               |
| E      | Oilcrops Oil, Other                    | Palm oil                                                                       | f      | 0                                                                     |                                               |
| E      | Oilcrops, Other                        | Spices, poppy seed                                                             | e      | 1.6                                                                   |                                               |
| E      | Olive Oil                              | Oil, olive, salad or cooking                                                   | e      | 0                                                                     |                                               |
| E      | Olives                                 | Olives, pickled, canned or bottled, green                                      | e      | 0.9                                                                   |                                               |
| E      | Onions                                 | Onion, raw                                                                     | f      | 2                                                                     |                                               |
| E      | Oranges, Mandarines                    | Orange, raw                                                                    | f      | 1                                                                     |                                               |
| E      | Palm Oil                               | Palm oil                                                                       | f      | 0                                                                     |                                               |
| E      | Palmkernel Oil                         | Palm oil                                                                       | f      | 0                                                                     |                                               |
| E      | Peas                                   | Peas, raw                                                                      | f      | 0                                                                     |                                               |
| E      | Pelagic Fish                           | Mackerel, spanish, raw                                                         | f      | 37                                                                    |                                               |
| E      | Pepper                                 | Spices, pepper, black                                                          | e      | 3.1                                                                   |                                               |
| E      | Pigmeat                                | Pork, meat, approx. 40% fat, raw                                               | f      | 6                                                                     |                                               |
| E      | Pimento                                | Peppers, hot chili, red, raw                                                   | e      | 0.5                                                                   |                                               |
| E      | Pineapples                             | Pineapple, pulp, raw                                                           | f      | 0                                                                     |                                               |
| E      | Plantains                              | Plantain, ripe, raw                                                            | f      | 2                                                                     |                                               |
| E      | Potatoes                               | Potato, raw                                                                    | f      | 2                                                                     |                                               |
| E      | Poultry Meat                           | Chicken, fresh only, raw                                                       | f      | 12                                                                    |                                               |
| E      | Pulses, Other                          | Fresh Pigeon peas                                                              | c      | 6.4                                                                   |                                               |
| E      | Rape and Mustard Oil                   | Vegetable oil, mustard                                                         | e      | 0                                                                     |                                               |
| E      | Rice (Milled Equivalent)               | Rice                                                                           | c      | 2.4                                                                   |                                               |
| E      | Ricebran Oil                           | Oil, vegetable, rice bran                                                      | e      | 0                                                                     |                                               |
| E      | Roots, Other                           | Taro, tuber, raw                                                               | f      | 1                                                                     |                                               |
| E      | Rye                                    | Rye                                                                            | e      | 35.3                                                                  |                                               |
| E      | Sesameseed                             | Seeds, sesame seeds, whole, dried                                              | e      | 5.7                                                                   |                                               |
| E      | Sesameseed Oil                         | Oil, sesame, salad or cooking                                                  | e      | 0                                                                     |                                               |
| E      | Sorghum                                | Sorghum                                                                        | c      | 12.9                                                                  |                                               |
| E      | Soyabean Oil                           | Oil, soyabean, salad or cooking                                                | e      | 0                                                                     |                                               |
| E      | Soyabean                               | Soyabean, dried, raw                                                           | f      | 14                                                                    |                                               |
| E      | Spices, Other                          | Spices, turmeric, ground                                                       | e      | 4.5                                                                   |                                               |
| E      | Sugar (Raw Equivalent)                 | Sugar, white                                                                   | f      | 0                                                                     |                                               |
| E      | Sugar Beet                             | Beets, raw                                                                     | e      | 0.7                                                                   |                                               |
| E      | Sugar Cane                             | Sugar, white                                                                   | f      | 0                                                                     |                                               |
| E      | Sugar, Non-Centrifugal                 | Sugar, white                                                                   | f      | 0                                                                     |                                               |
| E      | Sunflowerseed                          | Seeds, sunflower seed kernels, dried                                           | e      | 59.5                                                                  |                                               |
| E      | Sunflowerseed Oil                      | Oil, vegetable, sunflower, linoleic (approx. 65%)                              | e      | 0                                                                     |                                               |
| E      | Sweet Potatoes                         | Sweet potato, raw                                                              | f      | 2                                                                     |                                               |
| E      | Sweeteners, Other                      | Sweeteners, tabletop, saccharin                                                | e      | 0                                                                     |                                               |
| E      | Tea                                    | Tea, infusion                                                                  | f      | 0                                                                     |                                               |
| E      | Tomatoes                               | Tomato, raw                                                                    | f      | 1                                                                     |                                               |
| E      | Vegetables, Other                      | Cabbage, raw                                                                   | f      | 1                                                                     |                                               |
| E      | Wheat                                  | Wheat flour, white                                                             | f      | 2                                                                     |                                               |
| E      | Wine                                   | Alcoholic beverage, wine, table, all                                           | e      | 0.2                                                                   |                                               |
| E      | Yams                                   | Yam tuber, raw                                                                 | f      | 1                                                                     |                                               |
| S      | Apples                                 | Apples, raw, with skin                                                         | e      | 0                                                                     |                                               |
| S      | Aquatic Animals, Others                | Matemba (fresh)                                                                | c      | 11.1                                                                  |                                               |
| S      | Aquatic Plants                         | Seaweed, agar, raw                                                             | e      | 0.7                                                                   |                                               |
| S      | Bananas                                | Banana                                                                         | c      | 0.5                                                                   |                                               |
| S      | Barley                                 | Barley, pearled, raw                                                           | e      | 37.7                                                                  |                                               |
| S      | Beans                                  | Bengal beans                                                                   | c      | 2.5                                                                   |                                               |
| S      | Beer                                   | Beer Europe (4.4% alcohol)                                                     | f      | 0                                                                     |                                               |
| S      | Beverages, Alcoholic                   | Alcoholic beverage, distilled, all (gin, rum, vodka, whiskey) 80° proof        | e      | 0                                                                     |                                               |
| S      | Beverages, Fermented                   | Sorghum porridge                                                               | c      | 9.3                                                                   |                                               |
| S      | Bovine Meat                            | Beef, meat, approx. 20% fat, raw                                               | f      | 8                                                                     |                                               |
| S      | Butter, Ghee                           | Ghee, butter                                                                   | g      | 0                                                                     |                                               |
| S      | Cassava                                | Cassava, raw                                                                   | f      | 1                                                                     |                                               |
| S      | Cephalopods                            | Molluscs, squid, mixed species, raw                                            | e      | 44.8                                                                  |                                               |
| S      | Cereals, Other                         | Wheat flour, white                                                             | f      | 2                                                                     |                                               |
| S      | Citrus, Other                          | Orange, raw                                                                    | f      | 1                                                                     |                                               |
| S      | Cloves                                 | Spices, cloves, ground                                                         | e      | 5.9                                                                   |                                               |
| S      | Cocoa Beans                            | Cocoa, dry powder, unsweetened                                                 | e      | 14.3                                                                  |                                               |
| S      | Coconut Oil                            | Coconut oil                                                                    | f      | 0                                                                     |                                               |
| S      | Coconuts - Incl Copra                  | Coconut, raw                                                                   | f      | 810                                                                   |                                               |
| S      | Coffee                                 | Coffee, brewed from grounds, prepared with tap water                           | e      | 0                                                                     |                                               |
| S      | Cottonseed Oil                         | Cottonseed oil                                                                 | g      | 0                                                                     |                                               |
| S      | Cream                                  | Cream, fresh, double, including Jersey cream                                   | g      | 3                                                                     |                                               |
| S      | Crustaceans                            | Crustaceans, crab, blue, raw                                                   | e      | 37.4                                                                  |                                               |
| S      | Dates                                  | Dates, deglet noor                                                             | e      | 3                                                                     |                                               |
| S      | Demersal Fish                          | Fish, herring, Pacific, raw                                                    | e      | 36.5                                                                  |                                               |
| S      | Eggs                                   | Egg, raw                                                                       | f      | 11                                                                    |                                               |
| S      | Fats, Animals, Raw                     | Lard                                                                           | e      | 0.2                                                                   |                                               |
| S      | Fish, Body Oil                         | Fish oil, sardine                                                              | e      | 0                                                                     |                                               |
| S      | Fish, Liver Oil                        | Fish oil, cod liver                                                            | e      | 0                                                                     |                                               |
| S      | Freshwater Fish                        | Matemba (fresh)                                                                | c      | 11.1                                                                  |                                               |
| S      | Fruits, Other                          | Mango (raw)                                                                    | f      | 0.6                                                                   |                                               |
| S      | Grapefruit                             | Grapefruit, raw, pink and red and white, all areas                             | e      | 0.1                                                                   |                                               |
| S      | Grapes                                 | Grapes, red or green (European type varieties, such as Thompson seedless), raw | e      | 0.1                                                                   |                                               |
| S      | Groundnut Oil                          | Groundnut oil                                                                  | f      | 0                                                                     |                                               |
| S      | Groundnuts (Shelled Eq)                | Groundnut, dried, raw                                                          | f      | 3                                                                     |                                               |
| S      | Honey                                  | Honey                                                                          | f      | 1                                                                     |                                               |
| S      | Lemons, Limes                          | Lemon, fruit, raw                                                              | f      | 0                                                                     |                                               |
| S      | Maize                                  | White Ufa                                                                      | c      | 2.6                                                                   |                                               |
| S      | Maize Germ Oil                         | Wheatgerm oil                                                                  | g      | 0                                                                     |                                               |
| S      | Marine Fish, Other                     | Fish, herring, Pacific, raw                                                    | e      | 36.5                                                                  |                                               |
| S      | Meat, Aquatic Mammals                  | Fish, herring, Pacific, raw                                                    | e      | 36.5                                                                  |                                               |
| S      | Meat, Other                            | Lamb, meat not specified, raw                                                  | f      | 4                                                                     |                                               |
| S      | Milk - Excluding Butter                | Milk, cow, whole, raw                                                          | f      | 1                                                                     |                                               |
| S      | Millet                                 | Millet flour                                                                   | c      | 8                                                                     |                                               |
| S      | Molluscs, Other                        | Molluscs, snail, raw                                                           | e      | 27.4                                                                  |                                               |
| S      | Mutton & Goat Meat                     | Lamb, meat not specified, raw                                                  | f      | 4                                                                     |                                               |
| S      | Nuts                                   | Cashew nut, raw                                                                | f      | 24                                                                    |                                               |
| S      | Oats                                   | Wheat flour, white                                                             | f      | 2                                                                     |                                               |
| S      | Offals, Edible                         | Beef liver, raw                                                                | f      | 40                                                                    |                                               |
| S      | Oilcrops Oil, Other                    | Palm oil                                                                       | f      | 0                                                                     |                                               |
| S      | Oilcrops, Other                        | Spices, poppy seed                                                             | e      | 1.6                                                                   |                                               |
| S      | Olive Oil                              | Oil, olive, salad or cooking                                                   | e      | 0                                                                     |                                               |
| S      | Olives                                 | Olives, pickled, canned or bottled, green                                      | e      | 0.9                                                                   |                                               |

|   |                          |                                                                                |   |      |
|---|--------------------------|--------------------------------------------------------------------------------|---|------|
| S | Onions                   | Onion, raw                                                                     | f | 2    |
| S | Oranges, Mandarines      | Orange, raw                                                                    | f | 1    |
| S | Palm Oil                 | Palm oil                                                                       | f | 0    |
| S | Palmkernel Oil           | Palm oil                                                                       | f | 0    |
| S | Peas                     | Peas, raw                                                                      | f | 0    |
| S | Pelagic Fish             | Mackerel, spanish, raw                                                         | f | 37   |
| S | Pepper                   | Spices, pepper, black                                                          | e | 3.1  |
| S | Pigmeat                  | Pork, meat, approx. 40% fat, raw                                               | f | 6    |
| S | Pimento                  | Peppers, hot chili, red, raw                                                   | e | 0.5  |
| S | Pineapples               | Pineapple, pulp, raw                                                           | f | 0    |
| S | Plantains                | Plantain, ripe, raw                                                            | f | 2    |
| S | Potatoes                 | Potato, raw                                                                    | f | 2    |
| S | Poultry Meat             | Chicken, flesh only, raw                                                       | f | 12   |
| S | Pulses, Other            | Fresh Pigeon peas                                                              | c | 6.4  |
| S | Rape and Mustard Oil     | Vegetable oil, mustard                                                         | e | 0    |
| S | Rice (Milled Equivalent) | Rice                                                                           | c | 2.4  |
| S | Ricebran Oil             | Oil, vegetable, rice bran                                                      | e | 0    |
| S | Roots, Other             | Taro, tuber, raw                                                               | f | 1    |
| S | Rye                      | Rye                                                                            | e | 35.3 |
| S | Sesameseed               | Seeds, sesame seeds, whole, dried                                              | e | 5.7  |
| S | Sesameseed Oil           | Oil, sesame, salad or cooking                                                  | e | 0    |
| S | Sorghum                  | Sorghum                                                                        | c | 12.9 |
| S | Soyabean Oil             | Oil, soyabean, salad or cooking                                                | e | 0    |
| S | Soyabeans                | Soyabean, dried, raw                                                           | f | 14   |
| S | Spices, Other            | Spices, turmeric, ground                                                       | e | 4.5  |
| S | Sugar (Raw Equivalent)   | Sugar, white                                                                   | f | 0    |
| S | Sugar Beet               | Beets, raw                                                                     | e | 0.7  |
| S | Sugar Cane               | Sugar, white                                                                   | f | 0    |
| S | Sugar, Non-Centrifugal   | Sugar, white                                                                   | f | 0    |
| S | Sunflowerseed            | Seeds, sunflower seed kernels, dried                                           | e | 59.5 |
| S | Sunflowerseed Oil        | Oil, vegetable, sunflower, linoleic (approx. 65%)                              | e | 0    |
| S | Sweet Potatoes           | Sweet potato, raw                                                              | f | 2    |
| S | Sweeteners, Other        | Sweeteners, tabletop, saccharin                                                | e | 0    |
| S | Tea                      | Tea, infusion                                                                  | f | 0    |
| S | Tomatoes                 | Tomato, raw                                                                    | f | 1    |
| S | Vegetables, Other        | Cabbage, raw                                                                   | f | 1    |
| S | Wheat                    | Wheat flour, white                                                             | f | 2    |
| S | Wine                     | Alcoholic beverage, wine, table, all                                           | e | 0.2  |
| S | Yams                     | Yam tuber, raw                                                                 | f | 1    |
| W | Apples                   | Apples, raw, with skin                                                         | e | 0    |
| W | Aquatic Animals, Others  | Matemba (fresh)                                                                | c | 11.1 |
| W | Aquatic Plants           | Seaweed, agar, raw                                                             | e | 0.7  |
| W | Bananas                  | Banana, fruit, raw                                                             | f | 1    |
| W | Barley                   | Barley, pearled, raw                                                           | e | 37.7 |
| W | Beans                    | Bengal beans                                                                   | c | 2.5  |
| W | Beer                     | Beer Europe (4.4% alcohol)                                                     | f | 0    |
| W | Beverages, Alcoholic     | Alcoholic beverage, distilled, all (gin, rum, vodka, whiskey) 80° proof        | e | 0    |
| W | Beverages, Fermented     | Sorghum porridge                                                               | c | 9.3  |
| W | Bovine Meat              | Beef, meat, approx. 20% fat, raw                                               | f | 8    |
| W | Butter, Ghee             | Ghee, butter                                                                   | g | 0    |
| W | Cassava                  | Cassava, raw                                                                   | f | 1    |
| W | Cephalopods              | Molluscs, squid, mixed species, raw                                            | e | 44.8 |
| W | Cereals, Other           | Wheat flour, white                                                             | f | 2    |
| W | Citrus, Other            | Orange, raw                                                                    | f | 1    |
| W | Cloves                   | Spices, cloves, ground                                                         | e | 5.9  |
| W | Cocoa Beans              | Cocoa, dry powder, unsweetened                                                 | e | 14.2 |
| W | Coconut Oil              | Coconut oil                                                                    | f | 0    |
| W | Coconuts - Incl Copra    | Coconut, raw                                                                   | f | 810  |
| W | Coffee                   | Coffee, brewed from grounds, prepared with tap water                           | e | 0    |
| W | Cottonseed Oil           | Cottonseed oil                                                                 | g | 0    |
| W | Cream                    | Cream, fresh, double, including Jersey cream                                   | g | 3    |
| W | Crustaceans              | Crustaceans, crab, blue, raw                                                   | e | 37.4 |
| W | Dates                    | Dates, deglet noor                                                             | e | 3    |
| W | Demersal Fish            | White grouper, raw                                                             | f | 39   |
| W | Eggs                     | Egg, raw                                                                       | f | 11   |
| W | Fats, Animals, Raw       | Lard                                                                           | e | 0.2  |
| W | Fish, Body Oil           | Fish oil, sardine                                                              | e | 0    |
| W | Fish, Liver Oil          | Fish oil, cod liver                                                            | e | 0    |
| W | Freshwater Fish          | Matemba (fresh)                                                                | c | 11.1 |
| W | Fruits, Other            | Mango, ripe, fruit, raw                                                        | f | 1    |
| W | Grapefruit               | Grapefruit, raw, pink and red and white, all areas                             | e | 0.1  |
| W | Grapes                   | Grapes, red or green (European type varieties, such as Thompson seedless), raw | e | 0.1  |
| W | Groundnut Oil            | Groundnut oil                                                                  | f | 0    |
| W | Groundnuts (Shelled Eq)  | Groundnut, dried, raw                                                          | f | 3    |
| W | Honey                    | Honey                                                                          | f | 1    |
| W | Lemons, Limes            | Lemon, fruit, raw                                                              | f | 0    |
| W | Maize                    | Maize, white, whole, dried, raw                                                | f | 16   |
| W | Maize Germ Oil           | Wheatgerm oil                                                                  | g | 0    |
| W | Marine Fish, Other       | Sardines, raw                                                                  | f | 37   |
| W | Meat, Aquatic Mammals    | Fish, herring, Pacific, raw                                                    | e | 36.5 |
| W | Meat, Other              | Rabbit, meat, raw                                                              | f | 10   |
| W | Milk - Excluding Butter  | Milk, cow, whole, raw                                                          | f | 1    |
| W | Millet                   | Millet flour                                                                   | c | 8    |
| W | Molluscs, Other          | Molluscs, snail, raw                                                           | e | 27.4 |
| W | Mutton & Goat Meat       | Lamb, meat not specified, raw                                                  | f | 4    |
| W | Nuts                     | Cashew nut, raw                                                                | f | 24   |
| W | Oats                     | Wheat flour, white                                                             | f | 2    |
| W | Offals, Edible           | Beef liver, raw                                                                | f | 40   |
| W | Oilcrops Oil, Other      | Palm oil                                                                       | f | 0    |
| W | Oilcrops, Other          | Spices, poppy seed                                                             | e | 1.6  |
| W | Olive Oil                | Oil, olive, salad or cooking                                                   | e | 0    |
| W | Olives                   | Olives, pickled, canned or bottled, green                                      | e | 0.9  |
| W | Onions                   | Onion, raw                                                                     | f | 2    |
| W | Oranges, Mandarines      | Orange, raw                                                                    | f | 1    |
| W | Palm Oil                 | Palm oil                                                                       | f | 0    |
| W | Palmkernel Oil           | Palm oil                                                                       | f | 0    |
| W | Peas                     | Peas, raw                                                                      | f | 0    |
| W | Pelagic Fish             | Mackerel, spanish, raw                                                         | f | 37   |
| W | Pepper                   | Spices, pepper, black                                                          | e | 3.1  |
| W | Pigmeat                  | Pork, meat, approx. 40% fat, raw                                               | f | 6    |
| W | Pimento                  | Peppers, hot chili, red, raw                                                   | e | 0.5  |
| W | Pineapples               | Pineapple, pulp, raw                                                           | f | 0    |
| W | Plantains                | Plantain, ripe, raw                                                            | f | 2    |
| W | Potatoes                 | Potato, raw                                                                    | f | 2    |
| W | Poultry Meat             | Chicken, flesh only, raw                                                       | f | 12   |
| W | Pulses, Other            | Cowpea, dried, raw                                                             | f | 8    |
| W | Rape and Mustard Oil     | Vegetable oil, mustard                                                         | e | 0    |
| W | Rice (Milled Equivalent) | Rice                                                                           | c | 2.4  |
| W | Ricebran Oil             | Oil, vegetable, rice bran                                                      | e | 0    |
| W | Roots, Other             | Taro, tuber, raw                                                               | f | 1    |
| W | Rye                      | Rye                                                                            | e | 35.3 |
| W | Sesameseed               | Seeds, sesame seeds, whole, dried                                              | e | 5.7  |
| W | Sesameseed Oil           | Oil, sesame, salad or cooking                                                  | e | 0    |
| W | Sorghum                  | Sorghum, whole grain, raw                                                      | f | 13   |
| W | Soyabean Oil             | Oil, soyabean, salad or cooking                                                | e | 0    |
| W | Soyabeans                | Soyabean, dried, raw                                                           | f | 14   |
| W | Spices, Other            | Spices, turmeric, ground                                                       | e | 4.5  |
| W | Sugar (Raw Equivalent)   | Sugar, white                                                                   | f | 0    |
| W | Sugar Beet               | Beets, raw                                                                     | e | 0.7  |
| W | Sugar Cane               | Sugar, white                                                                   | f | 0    |
| W | Sugar, Non-Centrifugal   | Sugar, white                                                                   | f | 0    |
| W | Sunflowerseed            | Seeds, sunflower seed kernels, dried                                           | e | 59.5 |
| W | Sunflowerseed Oil        | Oil, vegetable, sunflower, linoleic (approx. 65%)                              | e | 0    |
| W | Sweet Potatoes           | Sweet potato, raw                                                              | f | 2    |
| W | Sweeteners, Other        | Sweeteners, tabletop, saccharin                                                | e | 0    |
| W | Tea                      | Tea, infusion                                                                  | f | 0    |
| W | Tomatoes                 | Tomato, raw                                                                    | f | 1    |
| W | Vegetables, Other        | Cabbage, raw                                                                   | f | 1    |
| W | Wheat                    | Wheat flour, white                                                             | f | 2    |
| W | Wine                     | Alcoholic beverage, wine, table, all                                           | e | 0.2  |
| W | Yams                     | Yam tuber, raw                                                                 | f | 1    |

#### Source key

c (ref. 37) Donovan, U.M., Gibson, R.S., Ferguson, E.L., Oumppu, S. & Heywood, P. The Selenium Content of Staple Foods from Malawi and Papua New Guinea. *J. Food Compos. Anal.* 4, 329-336 (1991).

e (ref. 22) U.S. Department of Agriculture, Agricultural Research Service (USDA-ARS). USDA National Nutrient Database for Standard Reference, Release 24. Nutrient Data Laboratory Home Page. Accessed online November 30, 2011: <http://www.ars.usda.gov/nutrientdata> (2011).

f (ref. 21) Stadlmayr, B. et al. *Composition of Selected Foods from West Africa*. (Food and Agriculture Organization, Rome, 2010).

g (ref. 38) Food Standards Agency. *McCance and Widdowson's The Composition of Foods, Sixth Summary Edition*. (Royal Society of Chemistry, Cambridge, 2002).

Supplementary Table 4. Dietary energy and Se availability and risk of dietary Se deficiency estimated from population demographics, food balance sheets and food Se composition tables; EAR=Estimated Average Requirement

| Country (FAO)                    | Country (used for mapping)            | Available energy supply (kcal capita <sup>-1</sup> d <sup>-1</sup> ) | 2010 population (UN) | 0-9 yr (Se EAR=23 µg capita <sup>-1</sup> d <sup>-1</sup> ) | 10+ yr (Se EAR=45 µg capita <sup>-1</sup> d <sup>-1</sup> ) | Pregnant (Se EAR=49 µg capita <sup>-1</sup> d <sup>-1</sup> ) | Lactating (Se EAR=59 µg capita <sup>-1</sup> d <sup>-1</sup> ) | Average Se EAR (µg capita <sup>-1</sup> d <sup>-1</sup> ) | Se supply (µg capita <sup>-1</sup> d <sup>-1</sup> ) | Standard Deviation | Proportion <EAR | % <EAR | Number <EAR      |
|----------------------------------|---------------------------------------|----------------------------------------------------------------------|----------------------|-------------------------------------------------------------|-------------------------------------------------------------|---------------------------------------------------------------|----------------------------------------------------------------|-----------------------------------------------------------|------------------------------------------------------|--------------------|-----------------|--------|------------------|
| Algeria                          | Algeria                               | 3600                                                                 | 35711170             | 6595440                                                     | 27814966                                                    | 557469                                                        | 743292                                                         | 41.3                                                      | 58.1                                                 | 14.5               | 0.124           | 12.4   | 4428077          |
| Angola                           | Angola                                | 2428                                                                 | 19131990             | 6391272                                                     | 11283528                                                    | 624511                                                        | 832682                                                         | 38.4                                                      | 54.0                                                 | 13.5               | 0.123           | 12.3   | 2362732          |
| Benin                            | Benin                                 | 3093                                                                 | 8881757              | 2771193                                                     | 5477386                                                     | 271362                                                        | 361816                                                         | 38.8                                                      | 66.5                                                 | 16.6               | 0.048           | 4.8    | 426074           |
| Botswana                         | Botswana                              | 2499                                                                 | 2016250              | 437502                                                      | 1493212                                                     | 36658                                                         | 48878                                                          | 40.6                                                      | 44.1                                                 | 11.0               | 0.377           | 37.7   | 759659           |
| Burkina Faso                     | Burkina Faso                          | 3178                                                                 | 16496290             | 5380810                                                     | 9849481                                                     | 542571                                                        | 723428                                                         | 38.6                                                      | 101.3                                                | 25.3               | 0.007           | 0.7    | 109069           |
| Burundi                          | Burundi                               | 1668                                                                 | 8413188              | 2202604                                                     | 5705259                                                     | 216568                                                        | 288757                                                         | 39.8                                                      | 30.7                                                 | 7.7                | 0.881           | 88.1   | 7415690          |
| Cameroon                         | Cameroon                              | 2780                                                                 | 19684950             | 5675955                                                     | 12727124                                                    | 549372                                                        | 732497                                                         | 39.3                                                      | 69.7                                                 | 17.4               | 0.041           | 4.1    | 799095           |
| Central African Republic         | Central African Republic              | 2486                                                                 | 4422757              | 1241526                                                     | 2905794                                                     | 119046                                                        | 157393                                                         | 39.4                                                      | 44.3                                                 | 11.1               | 0.329           | 32.9   | 1455846          |
| Chad                             | Chad                                  | 2522                                                                 | 11258580             | 3684883                                                     | 6669073                                                     | 387695                                                        | 516026                                                         | 38.6                                                      | 47.4                                                 | 11.8               | 0.229           | 22.9   | 2582431          |
| Congo                            | Congo                                 | 3106                                                                 | 4063173              | 1166232                                                     | 2641054                                                     | 109666                                                        | 146221                                                         | 39.3                                                      | 69.6                                                 | 17.4               | 0.041           | 4.1    | 166211           |
| Cote d'Ivoire                    | Côte d'Ivoire                         | 3061                                                                 | 19817760             | 5670796                                                     | 12933927                                                    | 519874                                                        | 693166                                                         | 39.3                                                      | 84.9                                                 | 21.2               | 0.016           | 1.6    | 313080           |
| Democratic Republic of the Congo | Congo, The Democratic Republic of the | 2066                                                                 | 66148410             | 21945640                                                    | 39001214                                                    | 2229235                                                       | 2972313                                                        | 38.5                                                      | 29.5                                                 | 7.4                | 0.886           | 88.6   | 58626301         |
| Djibouti                         | Djibouti                              | 2285                                                                 | 891572               | 217511                                                      | 628173                                                      | 19667                                                         | 26222                                                          | 40.1                                                      | 26.7                                                 | 6.7                | 0.978           | 97.8   | 871632           |
| Egypt                            | Egypt                                 | 3408                                                                 | 81674540             | 17506663                                                    | 60751883                                                    | 1464016                                                       | 1952021                                                        | 40.7                                                      | 61.0                                                 | 15.2               | 0.092           | 9.2    | 7474962          |
| Eritrea                          | Eritrea                               | 1640                                                                 | 5267874              | 1588578                                                     | 3333205                                                     | 148325                                                        | 197767                                                         | 39.0                                                      | 47.7                                                 | 11.9               | 0.232           | 23.2   | 1221659          |
| Ethiopia                         | Ethiopia                              | 1833                                                                 | 83266300             | 23516040                                                    | 54894875                                                    | 2080887                                                       | 2774517                                                        | 39.4                                                      | 41.8                                                 | 10.5               | 0.407           | 40.7   | 33878196         |
| Gabon                            | Gabon                                 | 3396                                                                 | 1517479              | 361162                                                      | 1083519                                                     | 31199                                                         | 41599                                                          | 40.2                                                      | 84.2                                                 | 21.0               | 0.018           | 1.8    | 27914            |
| Gambia                           | Gambia                                | 2614                                                                 | 1730749              | 539967                                                      | 1071726                                                     | 51024                                                         | 68032                                                          | 38.8                                                      | 68.0                                                 | 17.2               | 0.040           | 4.0    | 70029            |
| Ghana                            | Ghana                                 | 3733                                                                 | 24512310             | 6648359                                                     | 16464624                                                    | 599712                                                        | 799616                                                         | 39.6                                                      | 263.6                                                | 65.9               | 0.000           | 0.0    | 8283             |
| Guinea                           | Guinea                                | 2806                                                                 | 10020580             | 3063120                                                     | 6257282                                                     | 300076                                                        | 400102                                                         | 39.0                                                      | 78.1                                                 | 19.5               | 0.022           | 2.2    | 224955           |
| Guinea-Bissau                    | Guinea - Bissau                       | 2507                                                                 | 4520728              | 445167                                                      | 970922                                                      | 44845                                                         | 59794                                                          | 39.2                                                      | 82.8                                                 | 20.7               | 0.018           | 1.8    | 26824            |
| Kenya                            | Kenya                                 | 2219                                                                 | 40668810             | 12379002                                                    | 25584760                                                    | 1159305                                                       | 1545740                                                        | 38.9                                                      | 36.5                                                 | 9.1                | 0.605           | 60.5   | 24611827         |
| Lesotho                          | Lesotho                               | 3071                                                                 | 2185317              | 541650                                                      | 1534570                                                     | 46750                                                         | 62334                                                          | 40.0                                                      | 32.3                                                 | 8.1                | 0.829           | 82.9   | 1812372          |
| Liberia                          | Liberia                               | 2493                                                                 | 4005019              | 1256542                                                     | 2464299                                                     | 121791                                                        | 162388                                                         | 38.8                                                      | 62.3                                                 | 15.6               | 0.065           | 6.5    | 262067           |
| Libya                            | Libyan Arab Jamahiriya                | 3547                                                                 | 6393420              | 1371217                                                     | 4753881                                                     | 114995                                                        | 153327                                                         | 40.7                                                      | 61.7                                                 | 15.4               | 0.087           | 8.7    | 554611           |
| Madagascar                       | Madagascar                            | 1887                                                                 | 20805670             | 6264800                                                     | 13224505                                                    | 564156                                                        | 752208                                                         | 39.0                                                      | 71.8                                                 | 17.9               | 0.038           | 3.8    | 704444           |
| Malawi                           | Malawi                                | 2527                                                                 | 14951050             | 4914496                                                     | 8889526                                                     | 493127                                                        | 657502                                                         | 38.5                                                      | 31.3                                                 | 7.8                | 0.821           | 82.1   | 12268719         |
| Mali                             | Mali                                  | 3000                                                                 | 15395070             | 5275847                                                     | 8835710                                                     | 550077                                                        | 733437                                                         | 38.3                                                      | 66.3                                                 | 16.6               | 0.046           | 4.6    | 701324           |
| Mauritania                       | Mauritania                            | 3097                                                                 | 3466238              | 970637                                                      | 2284331                                                     | 90544                                                         | 120726                                                         | 39.4                                                      | 55.0                                                 | 13.7               | 0.129           | 12.9   | 446338           |
| Morocco                          | Morocco                               | 3771                                                                 | 32206930             | 5935910                                                     | 25133744                                                    | 487404                                                        | 649871                                                         | 41.3                                                      | 91.1                                                 | 22.8               | 0.014           | 1.4    | 463529           |
| Mozambique                       | Mozambique                            | 2315                                                                 | 23482910             | 7394904                                                     | 14470709                                                    | 693127                                                        | 924170                                                         | 38.7                                                      | 39.5                                                 | 9.9                | 0.469           | 46.9   | 11003287         |
| Namibia                          | Namibia                               | 2677                                                                 | 2294913              | 563163                                                      | 1621621                                                     | 47198                                                         | 62931                                                          | 40.1                                                      | 105.2                                                | 26.3               | 0.007           | 0.7    | 15205            |
| Niger                            | Niger                                 | 3087                                                                 | 15533330             | 5558691                                                     | 8629414                                                     | 576523                                                        | 768698                                                         | 38.0                                                      | 81.1                                                 | 20.3               | 0.017           | 1.7    | 258763           |
| Nigeria                          | Nigeria                               | 3444                                                                 | 159021600            | 48883830                                                    | 98892659                                                    | 4819307                                                       | 6425743                                                        | 38.9                                                      | 101.6                                                | 25.4               | 0.007           | 0.7    | 1082900          |
| Rwanda                           | Rwanda                                | 2414                                                                 | 10659890             | 3283597                                                     | 6616537                                                     | 325609                                                        | 434145                                                         | 38.9                                                      | 48.8                                                 | 12.2               | 0.209           | 20.9   | 2228065          |
| Senegal                          | Senegal                               | 2657                                                                 | 12449740             | 3872402                                                     | 7736137                                                     | 360513                                                        | 480684                                                         | 38.8                                                      | 85.1                                                 | 21.3               | 0.015           | 1.5    | 184136           |
| Sierra Leone                     | Sierra Leone                          | 2356                                                                 | 5871303              | 1802482                                                     | 3651583                                                     | 178816                                                        | 238422                                                         | 38.9                                                      | 68.6                                                 | 17.1               | 0.042           | 4.2    | 246099           |
| South Africa                     | South Africa                          | 3329                                                                 | 50419690             | 10141649                                                    | 38343065                                                    | 829278                                                        | 1105704                                                        | 40.9                                                      | 58.2                                                 | 14.5               | 0.118           | 11.8   | 5943759          |
| Sudan                            | Sudan                                 | 2248                                                                 | 43718950             | 12232802                                                    | 28900486                                                    | 1108144                                                       | 1477526                                                        | 39.4                                                      | 53.6                                                 | 13.4               | 0.144           | 14.4   | 6312550          |
| Swaziland                        | Swaziland                             | 2519                                                                 | 1190839              | 306165                                                      | 822011                                                      | 26856                                                         | 35807                                                          | 39.9                                                      | 44.4                                                 | 11.1               | 0.342           | 34.2   | 407285           |
| Togo                             | Togo                                  | 2635                                                                 | 6053456              | 1659088                                                     | 4042821                                                     | 150663                                                        | 200884                                                         | 39.5                                                      | 70.9                                                 | 17.7               | 0.038           | 3.8    | 231848           |
| Tunisia                          | Tunisia                               | 3842                                                                 | 10602540             | 8625897                                                     | 138721                                                      | 138721                                                        | 184961                                                         | 41.9                                                      | 61.1                                                 | 15.3               | 0.104           | 10.4   | 1101383          |
| Uganda                           | Uganda                                | 2566                                                                 | 33531980             | 11797379                                                    | 19014974                                                    | 1165555                                                       | 1554073                                                        | 38.0                                                      | 67.0                                                 | 16.8               | 0.042           | 4.2    | 1403923          |
| United Republic of Tanzania      | Tanzania, United Republic of          | 2303                                                                 | 45011760             | 14583788                                                    | 27149146                                                    | 1405211                                                       | 1873615                                                        | 38.6                                                      | 114.6                                                | 28.7               | 0.004           | 0.4    | 179123           |
| Zambia                           | Zambia                                | 2156                                                                 | 13135080             | 4382042                                                     | 7729293                                                     | 438748                                                        | 584997                                                         | 38.4                                                      | 28.1                                                 | 7.0                | 0.929           | 92.9   | 12205087         |
| Zimbabwe                         | Zimbabwe                              | 2620                                                                 | 12651440             | 3286129                                                     | 8713777                                                     | 279230                                                        | 372307                                                         | 39.8                                                      | 30.2                                                 | 7.5                | 0.899           | 89.9   | 11370262         |
| <b>TOTAL</b>                     |                                       |                                                                      | <b>1012155352</b>    |                                                             |                                                             |                                                               |                                                                |                                                           |                                                      |                    |                 |        | <b>219247629</b> |

Footnotes:

Demographic data from: UN (2010). Population Data. Accessed online May 1, 2012: <http://esa.un.org/unpd/wpp/Excel-Data/population.htm> (United Nations, 2010).

EAR data from: Institute of Medicine (2002). Dietary Reference Intakes for Vitamin C, Vitamin E, Selenium, and Carotenoids: A Report of the Panel on Dietary Antioxidants and Related Compounds.

Subcommittees on Upper Reference Levels of Nutrients and of Interpretation and Use of Dietary Reference Intakes, and the Standing Committee on the Scientific Evaluation of Dietary Reference Intakes. (National Academies Press, Washington DC, 2002).
